# Supplementary material
Source: Springer Nature journal article supplement (https://www.springermedizin.de/resource/supplementary/12887_2011_549_MOESM3_ESM.pdf/9475544)

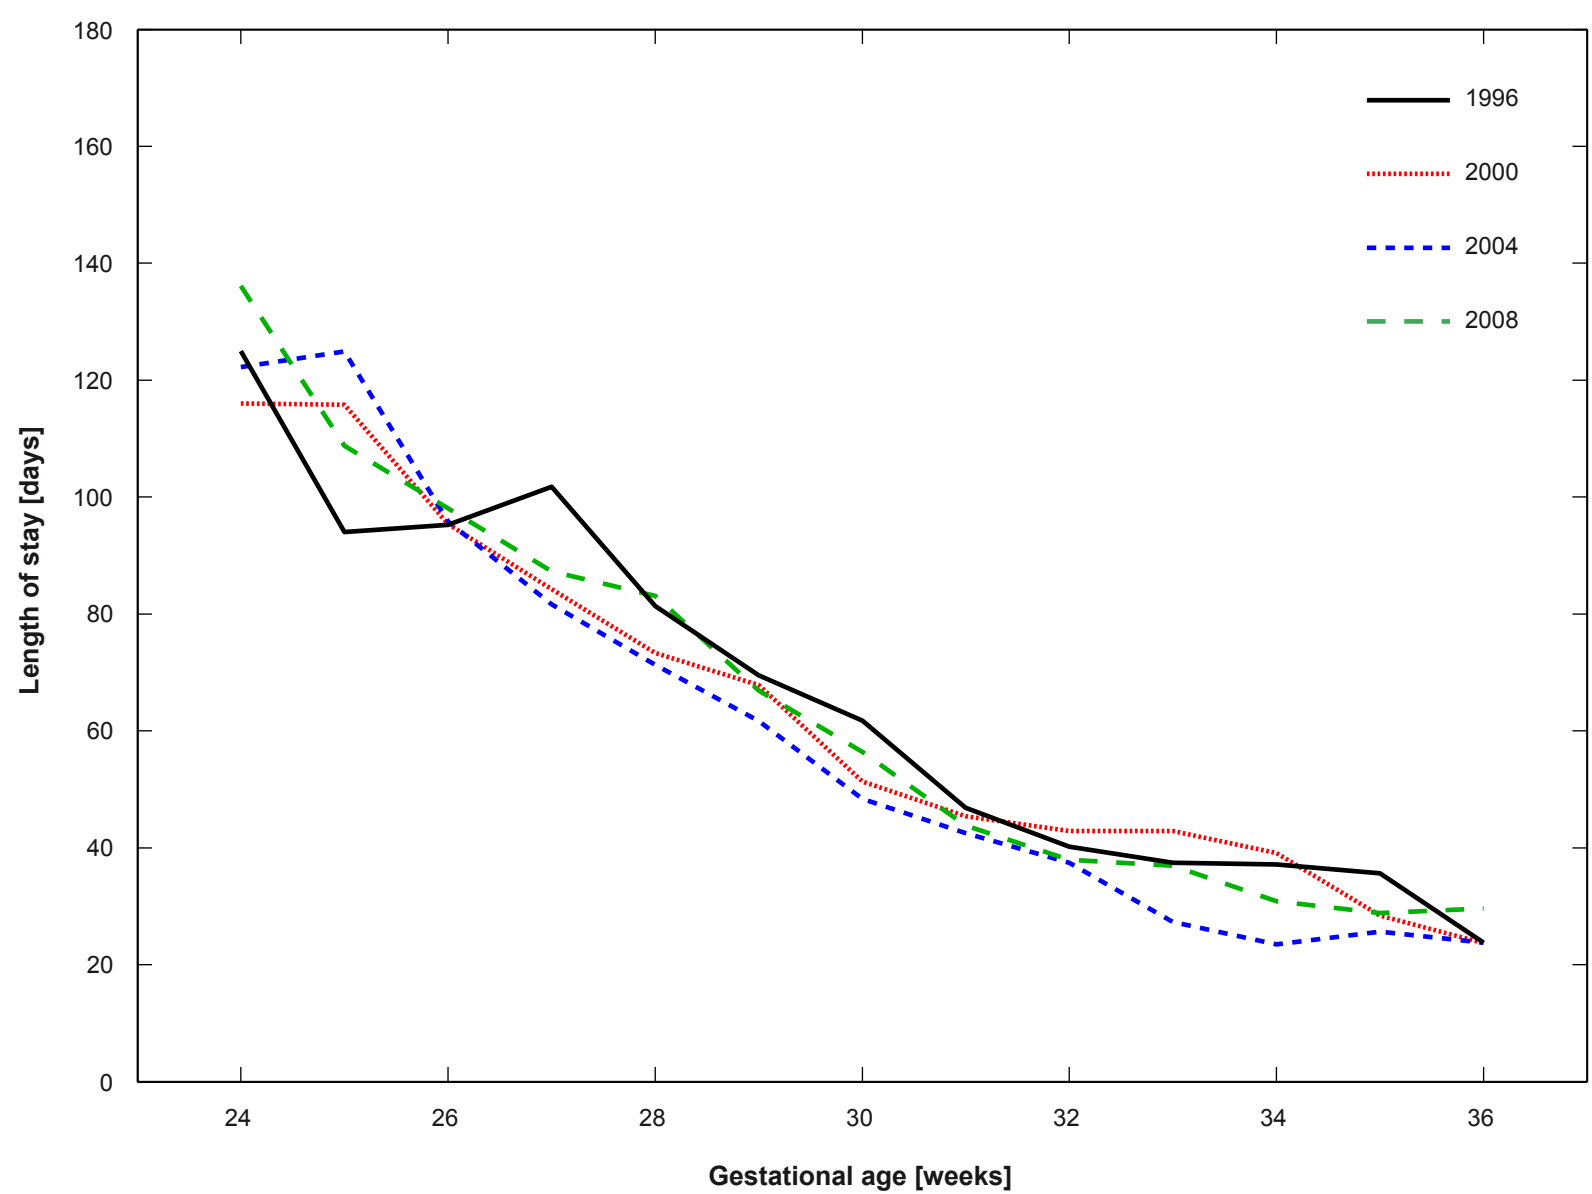

Supplement: MOESM3 [file 9475544]
